# Supplementary material for: Genetically altered animal models for ATP1A3-related disorders
Source: PubMed Central journal article supplement (PMC8503543; doi:10.1242/dmm.048938), 2021-10-06
Supplement: dmm-14-048938-s1.pdf [file dmm-14-048938-s1.pdf]

**Table S1. *ATPIA3* mutations found in *ATPIA3*-related disorders other than AHC**

| Amino acid change | NKA $\alpha_3$ domain | Residue conservation | CDS change        | Primary diagnosis (other than AHC) | References                                             |
|-------------------|-----------------------|----------------------|-------------------|------------------------------------|--------------------------------------------------------|
| V129M             | M2                    | M, D, C              | c.385G>A          | COS                                | Smedemark-Margulies et al., 2016                       |
| S137del*          | M2                    | M, D                 | c.410_412del-CCT* | RDP (without parkinsonism)         | Wilcox et al., 2015                                    |
| Q140H             | M2                    | M, D, C              | c.420G>T          | D-DEMØ                             | Prange et al., 2020                                    |
| I274T             | M3                    | M, D, C              | c.821T>C          | RDP                                | de Carvalho Aguiar et al., 2004; Kamphuis et al., 2006 |
| E277K**           | M3                    | M, D, C              | c.829G>A          | RDP                                | de Carvalho Aguiar et al., 2004                        |
| L292R             | M3                    | M, D, C              | c.875T>G          | PMG                                | Vetro et al., 2021                                     |
| G316S             | M4                    | M, D, C              | c.946G>A          | ARA                                | Sweadner et al., 2016                                  |
| G316V             | M4                    | M, D, C              | c.947G>T          | PMG                                | Vetro et al., 2021                                     |
| I318M             | M4                    | M, D, C              | c.954C>G          | Parkinsonism with ID               | Kwong et al., 2021                                     |
| E324G             | M4                    | M, D, C              | c.971A>G          | D-DEMØ                             | Prange et al., 2020                                    |
| G325D             | M4                    | M, D, C              | c.974G>A          | D-DEMØ                             | Prange et al., 2020                                    |
| L327del           | M4                    | M, D, C              | c.979_981delCTG   | RDP                                | Kamm et al., 2008                                      |
| G358V             | P                     | M, D, C              | c.1073G>T         | EIEE                               | Paciorkowski et al., 2015                              |
| T360R             | P                     | M, D, C              | c.1079C>G         | D-DEMØ                             | Prange et al., 2020                                    |
| S361P             | P                     | M, D, C              | c.1081T>C         | PMG                                | Vetro et al., 2021                                     |

| Amino acid change | NKA $\alpha_3$ domain | Residue conservation | CDS change | Primary diagnosis (other than AHC)       | References                                                                                       |
|-------------------|-----------------------|----------------------|------------|------------------------------------------|--------------------------------------------------------------------------------------------------|
| I363N             | P                     | M, D, C              | c.1088T>A  | EIEE                                     | Paciorkowski et al., 2015                                                                        |
| T370N**           | P                     | M, D, C              | c.1109C>A  | RDP                                      | Rosewich et al., 2014b                                                                           |
| W382R             | N                     | M, D, C              | c.1144T>C  | RDP                                      | Rosewich et al., 2014b                                                                           |
| D583Y             | N                     | M, D, C              | c.1747G>T  | RDP (infantile)                          | Nicita et al., 2016                                                                              |
| D591V             | N                     | M, D, C              | c.1772A>T  | adCORD                                   | Zhou et al., 2020                                                                                |
| C596Y             | P                     | M, D, C              | c.1787G>A  | PMG                                      | Miyatake et al., 2021                                                                            |
| D609Y             | P                     | M, D, C              | c.1825G>T  | Hypotonia with dyspneic episodes         | Marzin et al., 2018                                                                              |
| D609Y             | P                     | M, D, C              | c.1825G>T  | PMG                                      | Vetro et al., 2021                                                                               |
| T613M             | P                     | M, D, C              | c.1838C>T  | RDP                                      | de Carvalho Aguiar et al., 2004                                                                  |
| A681T             | P                     | M, D, C              | c.2041G>A  | ASD                                      | Torres et al., 2018                                                                              |
| S684F             | P                     | M, D, C              | c.2051C>T  | RDP                                      | Svetel et al., 2010                                                                              |
| G706R**           | P                     | M, D, C              | c.2116G>A  | EE with strabismus and autistic features | Hully et al., 2017                                                                               |
| N744K             | P                     | M, D, C              | c. 2232C>A | AHC/RDP intermediate                     | Sival et al., 2018                                                                               |
| R756C             | M5                    | M, D, C              | c.2266C>T  | RECA                                     | Dard et al., 2015; Jaffer et al., 2017; Nakamura et al., 2018; Nicita et al., 2016; Sabouraud et |

| Amino acid change | NKA $\alpha_3$ domain | Residue conservation | CDS change        | Primary diagnosis (other than AHC) | References                                                                                 |
|-------------------|-----------------------|----------------------|-------------------|------------------------------------|--------------------------------------------------------------------------------------------|
|                   |                       |                      |                   |                                    | al., 2019;<br>Sival et al.,<br>2018                                                        |
| R756C             | M5                    | M, D, C              | c.2266C>T         | ASD                                | Takata et al.,<br>2018                                                                     |
| R756C             | M5                    | M, D, C              | c.2266C>T         | CRA                                | Schirinzi et<br>al., 2018b                                                                 |
| R756H**           | M5                    | M, D, C              | c.2267G>A         | RDP<br>(infantile)                 | Brashear et<br>al., 2012b                                                                  |
| R756H**           | M5                    | M, D, C              | c.2267G>A         | RECA                               | Sabouraud et<br>al., 2019;<br>Yano et al.,<br>2017                                         |
| R756L             | M5                    | M, D, C              | c.2267G>T         | RECA                               | Yano et al.,<br>2017                                                                       |
| I758S             | M5                    | M, D, C              | c.2273T>G         | RDP                                | de Carvalho<br>Aguiar et al.,<br>2004                                                      |
| K764del           | M5                    | M, D, C              | c.2290_2292delAAG | PMG                                | Vetro et al.,<br>2021                                                                      |
| P775R             | M5                    | M, D, C              | c.2324C>G/        | PMG                                | Vetro et al.,<br>2021                                                                      |
| F780L             | M5                    | M, D, C              | c.2338T>C         | RDP                                | de Carvalho<br>Aguiar et al.,<br>2004                                                      |
| D801N**           | M6                    | M, D, C              | c.2401G>A         | PMG                                | Vetro et al.,<br>2021                                                                      |
| D801Y**           | M6                    | M, D, C              | c.2401G>T         | RDP                                | de Carvalho<br>Aguiar et al.,<br>2004                                                      |
| A813V             | M6                    | M, D, C              | c.2438T>C         | COS                                | Chaumette et<br>al., 2020                                                                  |
| E818K             | L6-7                  | M, D, C              | c.2452G>A         | CAPOS                              | Demos et al.,<br>2014; Duat<br>Rodriguez et<br>al., 2017;<br>Stavropoulos<br>et al., 2016; |

| Amino acid change | NKA $\alpha_3$ domain | Residue conservation | CDS change     | Primary diagnosis (other than AHC) | References                                                            |
|-------------------|-----------------------|----------------------|----------------|------------------------------------|-----------------------------------------------------------------------|
|                   |                       |                      |                |                                    | Stenshorne et al., 2019                                               |
| E818K             | L6–7                  | M, D, C              | c.2452G>A      | CRA                                | Schirinzi et al., 2018b                                               |
| Q851R             | M7                    | M, D, C              | c.2552A>G      | PMG                                | Smith et al., 2021                                                    |
| G854_F856del      | M7                    |                      | c.2560_2568del | PMG                                | Miyatake et al., 2021                                                 |
| F857del           | M7                    | M, D, C              | c.2570_2572del | PMG                                | Miyatake et al., 2021; Vetro et al., 2021                             |
| G867D             | L7–8                  | M, D, C              | c.2600G>A      | AHC/RDP intermediate               | Rosewich et al., 2014a                                                |
| D887Y             | L7–8                  | M, D                 | c.2659G>T      | PMG (familial)                     | Vetro et al., 2021                                                    |
| L888P             | L7–8                  | M, D                 | c.2663T>C      | PMG with AHC                       | Panagiotakaki et al., 2015; Gurrieri et al., 2016; Vetro et al., 2021 |
| G893W             | L7–8                  | M, D, C              | c.2677G>T      | PMG                                | Vetro et al., 2021                                                    |
| Q895P             | L7–8                  | M                    | c.2684A>C      | PMG                                | Miyatake et al., 2021                                                 |
| R901M             | L7–8                  | M, D, C              | c.2702G>T      | PMG                                | Smith et al., 2021                                                    |
| D923N**           | M8                    | M, D, C              | c.2767G>A      | RDP                                | Zanotti-Fregonara et al., 2008                                        |
| D923N**           | M8                    | M, D, C              | c.2767G>A      | RDP (infantile)                    | Anselm et al., 2009; Brashear et al., 2012b                           |
| L924P             | M8                    | M, D, C              | c.2771T>C      | PMG                                | Smith et al., 2021                                                    |

| Amino acid change           | NKA $\alpha_3$ domain | Residue conservation | CDS change        | Primary diagnosis (other than AHC) | References                |
|-----------------------------|-----------------------|----------------------|-------------------|------------------------------------|---------------------------|
| L924P                       | M8                    | M, D, C              | c.2771T>C         | EIEE                               | Arystarkhova et al., 2019 |
| E951K**                     | M9                    | M, D, C              | c.2851G>A         | AHC/RDP intermediate               | Termsarasab et al., 2015  |
| P972del                     | L9–10                 | M, D                 | c.2915_2917delCTC | PMG                                | Vetro et al., 2021        |
| abolition splice donor site |                       |                      | c.2921+1G>A       | PMG                                | Smith et al., 2021        |
| D992del                     | M10                   | M, D, C              | c.2976_2978del    | PMG                                | Miyatake et al., 2021     |
| D992dup                     | M10                   | M, D, C              | c.2976_2978dupCGA | PMG                                | Vetro et al., 2021        |
| Y4_I994delinsFAHLHL         | M10                   | M, C                 | c.2972_2982delins | PMG                                | Miyatake et al., 2021     |
| I994_R995insHEI             | M10                   | M, C                 | c.2975_2983dup    | PMG                                | Miyatake et al., 2021     |
| Y1013dup                    | C-term                | M, D, C              | c.3038_3040dup    | RDP                                | Blanco-Arias et al., 2009 |

CDS, coding sequence; M, conserved in mouse *Atp1a3*; D, conserved in *D. melanogaster ATPa*; C, conserved in *C. elegans eat-6*; EE, epileptic encephalopathy; ID, intellectual disability. Nucleotide and residue numbering are based on *ATPIA3* variant 1/isoform 1 (NM\_152296). \*Reported as p.S148del and erroneously as c.443\_445del-GAG with NKA  $\alpha_3$  isoform 2 numbering in Wilcox et al. (2015). \*\*Mutation also identified in AHC (Boelman et al., 2014; Heinzen et al., 2012; Hoei-Hansen et al., 2014; Panagiotakaki et al., 2015; Rosewich et al., 2014b; Viollet et al., 2015; Yang et al., 2014).

**Table S2. *ATPIA3* mutations found in AHC patients**

| Amino acid change           | NKA $\alpha_3$ domain | Residue conservation | CDS change             | No. of AHC cases <sup>†</sup> | % of AHC cases |
|-----------------------------|-----------------------|----------------------|------------------------|-------------------------------|----------------|
| S137F                       | M2                    | M, D                 | c.410C>T               | 3                             | 0.61           |
| S137Y                       | M2                    | M, D                 | c.410C>A               | 6                             | 1.22           |
| Q140L                       | M2                    | M, D, C              | c.419A>T               | 2                             | 0.41           |
| A264_A289delinsVLG*         | A                     | M, D, C              | c.791_866delinsTTCTGGG | 1                             | 0.20           |
| I274N                       | M3                    | M, D, C              | c.821T>A               | 7                             | 1.42           |
| V322D                       | M4                    | M, D, C              | 965T>A                 | 1                             | 0.20           |
| E324D**                     | M4                    | M, D, C              | c.972G>C               | 1                             | 0.20           |
| E324Q                       | M4                    | M, D, C              | c.970G>C               | 1                             | 0.20           |
| L326R                       | M4                    | M, D, C              | c.977T>G               | 2                             | 0.41           |
| abolition splice donor site |                       |                      | c.993+1_993+2del       | 1                             | 0.20           |
| C333F                       | M4                    | M, D, C              | c.998G>T               | 4                             | 0.81           |
| T335P                       | M4                    | M, D, C              | c.1003A>C              | 1                             | 0.20           |
| G358C                       | P                     | M, D, C              | c.1072G>T              | 1                             | 0.20           |
| G358S                       | P                     | M, D, C              | c.1072G>A              | 1                             | 0.20           |
| T370N                       | P                     | M, D, C              | c.1109C>A              | 1                             | 0.20           |
| L371P                       | P                     | M, D, C              | c.1112T>C              | 1                             | 0.20           |
| C596R                       | P                     | M, D, C              | c.1786T>C              | 2                             | 0.41           |
| G706R                       | P                     | M, D, C              | c.2116G>A              | 1                             | 0.20           |
| L715P                       | P                     | M, D, C              | c.2144T>C              | 1                             | 0.20           |
| G755A                       | M5                    | M, D, C              | c. 2264G>C             | 1                             | 0.20           |
| G755C                       | M5                    | M, D, C              | c.2263G>T              | 4                             | 0.81           |
| G755S                       | M5                    | M, D, C              | c.2263G>A              | 12                            | 2.43           |
| G755V                       | M5                    | M, D, C              | c.2264G>T              | 1                             | 0.20           |
| R756H                       | M5                    | M, D, C              | c.2267G>A              | 3                             | 0.61           |
| L757P                       | M5                    | M, D, C              | c.2270T>C              | 1                             | 0.20           |
| N761H                       | M5                    | M, D, C              | c.2281A>C              | 1                             | 0.20           |
| Y768C                       | M5                    | M, D, C              | c.2303A>G              | 1                             | 0.20           |
| Y768H                       | M5                    | M, D, C              | c.2302T>C              | 1                             | 0.20           |
| T769P                       | M5                    | M, D, C              | c.2305A>C              | 1                             | 0.20           |
| L770R                       | M5                    | M, D, C              | c.2309T>G              | 1                             | 0.20           |
| T771I                       | M5                    | M, D, C              | c.2312C>T              | 1                             | 0.20           |
| T771N                       | M5                    | M, D, C              | c.2312C>A              | 2                             | 0.41           |
| S772R                       | M5                    | M, D, C              | c.2314A>C              | 2                             | 0.41           |
| S772R                       | M5                    | M, D, C              | c.2316C>A              | 2                             | 0.41           |
| S772R                       | M5                    | M, D, C              | c.2316C>G              | 2                             | 0.41           |
| N773I                       | M5                    | M, D, C              | c.2318A>T              | 1                             | 0.20           |
| N773S                       | M5                    | M, D, C              | c.2318A>G              | 3                             | 0.61           |
| N773T                       | M5                    | M, D, C              | c.2318A>C              | 1                             | 0.20           |
| D801E                       | M6                    | M, D, C              | c.2403T>A              | 4                             | 0.81           |
| <b>D801N</b>                | <b>M6</b>             | <b>M, D, C</b>       | <b>c.2401G&gt;A</b>    | <b>194</b>                    | <b>39.35</b>   |
| D801V                       | M6                    | M, D, C              | c.2402A>T              | 1                             | 0.20           |
| D801Y                       | M6                    | M, D, C              | c.2401G>T              | 1                             | 0.20           |
| L802P                       | M6                    | M, D, C              | c.2405T>C              | 1                             | 0.20           |
| T804I                       | M6                    | M, D, C              | c.2411C>T              | 5                             | 1.01           |

| Amino acid change           | NKA $\alpha_3$ domain | Residue conservation | CDS change                                 | No. of AHC cases <sup>†</sup> | % of AHC cases |
|-----------------------------|-----------------------|----------------------|--------------------------------------------|-------------------------------|----------------|
| D805E                       | M6                    | M, D, C              | c.2415C>G                                  | 2                             | 0.41           |
| D805H                       | M6                    | M, D, C              | c.2413G>C                                  | 1                             | 0.20           |
| D805N                       | M6                    | M, D, C              | c.2413G>A                                  | 1                             | 0.20           |
| M806K                       | M6                    | M, D, C              | c.2417T>A                                  | 1                             | 0.20           |
| M806R                       | M6                    | M, D, C              | c.2417T>G                                  | 2                             | 0.41           |
| P808L                       | M6                    | M, D, C              | c.2423C>T                                  | 2                             | 0.41           |
| I810F                       | M6                    | M, D, C              | c.2428A>T                                  | 2                             | 0.41           |
| I810N                       | M6                    | M, D, C              | c.2429T>A                                  | 2                             | 0.41           |
| I810S                       | M6                    | M, D, C              | c.2429T>G                                  | 1                             | 0.20           |
| S811P                       | M6                    | M, D, C              | c.2431T>C                                  | 9                             | 1.83           |
| <b>E815K</b>                | <b>L6-7</b>           | <b>M, D, C</b>       | <b>c.2443G&gt;A</b>                        | <b>107</b>                    | <b>21.70</b>   |
| L839P                       | M7                    | M, D, C              | c.2516T>C                                  | 3                             | 0.61           |
| abolition splice donor site |                       |                      | c.2542+1:G>A                               | 4                             | 0.81           |
| abolition splice donor site |                       |                      | c.2542+2T>C                                | 2                             | 0.41           |
| R901T                       | L7-8                  | M, D, C              | c.2702G>C                                  | 1                             | 0.20           |
| V919del                     | M8                    | M, D, C              | c.2755_2757delGTC                          | 3                             | 0.61           |
| V919del                     | M8                    | M, D, C              | c.2751_2753delTGT                          | 2                             | 0.41           |
| D923N                       | M8                    | M, D, C              | c.2767G>A                                  | 3                             | 0.61           |
| D923Y                       | M8                    | M, D, C              | c.2767G>T                                  | 2                             | 0.41           |
| C927F                       | M8                    | M, D                 | c.2780G>T                                  | 3                             | 0.61           |
| C927W                       | M8                    | M, D                 | c.2781C>G                                  | 1                             | 0.20           |
| C927Y                       | M8                    | M, D                 | c.2780G>A                                  | 3                             | 0.61           |
| <b>G947R</b>                | <b>M9</b>             | <b>M, D, C</b>       | <b>c.2839G&gt;A</b><br><b>c.2839G&gt;C</b> | <b>44</b>                     | <b>8.92</b>    |
| E951K                       | M9                    | M, D, C              | c.2851G>A                                  | 2                             | 0.41           |
| A955D                       | M9                    | M, D, C              | c.2864C>A                                  | 2                             | 0.41           |
| D992Y                       | M10                   | M, D, C              | c.2974G>T                                  | 3                             | 0.61           |
|                             |                       |                      |                                            | n=493                         | 100%           |

CDS, coding sequence; M, transmembrane domain; P, phosphorylation domain; L, extracellular loop; M, conserved in mouse *Atp1a3*; D, conserved in *D. melanogaster ATPa*; C, conserved in *C. elegans eat-6*. Nucleotide and residue numbering are based on *ATPIA3* variant 1/isoform 1 (NM\_152296). The three most common mutations (D801N, E815K and G974R) are shown in bold text. \*p.A264\_A289delinsVLG is an in-frame indel. \*\*G324D was erroneously listed as Q324D by Viollet et al. (2015). \*\*\*Reported as c.2542-1:G>A in Heinzen et al. (2012). <sup>†</sup>Cases collated from cohorts of Heinzen et al. (2012), Rosewich et al. (2012), Ishii et al. (2013), Hoei-Hansen et al. (2014), Rosewich et al. (2014b), Sasaki et al. (2014), Yang et al. (2014), Panagiotakaki et al. (2015), Viollet et al. (2015).
